# Supplementary material for: To pool or not to pool? Trends and predictors of banking arrangements within Australian couples
Source: PLoS One. 2019 Apr 17;14(4):e0214019. doi: 10.1371/journal.pone.0214019 (PMC6469846; doi:10.1371/journal.pone.0214019)
Supplement: S2 Table — HILDA Survey (2002, 2006, 2010 & 2014). Odds ratios. All models feature robust standard errors. * p<0.05, ** p<0.01, *** p<0.001. (DOCX) [file pone.0214019.s002.docx]

**Table S2. Banking arrangements among heterosexual couples in Australia, full output for models testing Hypothesis 1.**

|  | Joint account  vs. no joint  account | Banking arrangements (ref. partners have only a joint account) | | | |
| --- | --- | --- | --- | --- | --- |
| Joint+man separate | Joint+woman  separate | Joint+both  separate | Both separate only |
| Couple’s mean age | 1.06*** | 0.97*** | 0.99* | 0.98*** | 0.96*** |
| Couples’ age difference (<=5 years) |  |  |  |  |  |
| Man 5 years older | 0.42*** | 1.43* | 1.17 | 1.46** | 1.86*** |
| Woman 5 years older | 0.31*** | 1.43 | 1.75 | 2.40** | 3.13*** |
| Marital status (*de facto*) |  |  |  |  |  |
| Married | 63.26*** | 0.11*** | 0.15*** | 0.04*** | 0.02*** |
| Employment status (neither employed) |  |  |  |  |  |
| Both employed | 3.22*** | 1.17 | 1.68*** | 1.23 | 0.62** |
| Only man employed | 2.45*** | 1.52* | 1.57** | 1.09 | 0.77 |
| Only woman employed | 1.23 | 1.57 | 1.98** | 1.67* | 1.45 |
| University degree (neither has degree) |  |  |  |  |  |
| Both have degrees | 1.65** | 1.91*** | 1.31 | 1.85*** | 1.44* |
| Only man has a degree | 1.42 | 1.41 | 1.12 | 1.57** | 1.19 |
| Only woman has a degree | 1.36 | 1.30 | 0.91 | 1.15 | 1.00 |
| Born in Australia (neither) a |  |  |  |  |  |
| Both born in Australia | 1.55* | 1.13 | 1.58** | 1.63*** | 1.14 |
| Only man born in Australia | 1.92* | 1.77* | 1.92** | 2.48*** | 1.40 |
| Only woman born in Australia | 1.73* | 1.27 | 1.50* | 1.73** | 1.09 |
| Total income (IHS) | 1.31*** | 1.29*** | 1.08 | 1.30*** | 0.94 |
| Relative resources (ref. similar contribution) |  |  |  |  |  |
| Women contribute 60%+ | 0.74* | 1.30 | 1.59*** | 1.39** | 1.59*** |
| Men contribute 60%+ | 1.06 | 1.11 | 1.29** | 1.00 | 1.07 |
| N (observations) | 15,379 | 15,379 | | | |
| N (couples) | 7,054 | 7,054 | | | |
| AIC/BIC | 11,158/11,295 | 40,944/41,471 | | | |

HILDA Survey (2002, 2006, 2010 & 2014). Odds ratios. All models feature robust standard errors. * *p<*0.05, ** *p<*0.01, *** *p<*0.001.
